# Supplementary material for: Enhanced photovoltaic performance of dye-sensitized solar cells using a highly crystallized mesoporous TiO2electrode modified by boron doping
Source: Royal Society of Chemistry journal article supplement (doi:10.1039/c0jm02941f), 2010-11-12
Supplement: c0jm02941f.pdf [file c0jm02941f.pdf]

Supplementary Material (ESI) for Journal of Materials Chemistry

5 **Enhanced photovoltaic performance of dye-sensitized solar cells using highly crystallized mesoporous TiO<sub>2</sub> electrode modified by boron doping**

Huajun Tian, Linhua Hu, Changneng Zhang, Shuanghong Chen, Jiang Sheng, Lie Mo, Weiqing Liu, Songyuan Dai\*

10 Key Lab of Novel Thin Film Solar Cells, Institute of Plasma Physics, Chinese Academy of Sciences

Supplementary Figure & Table:

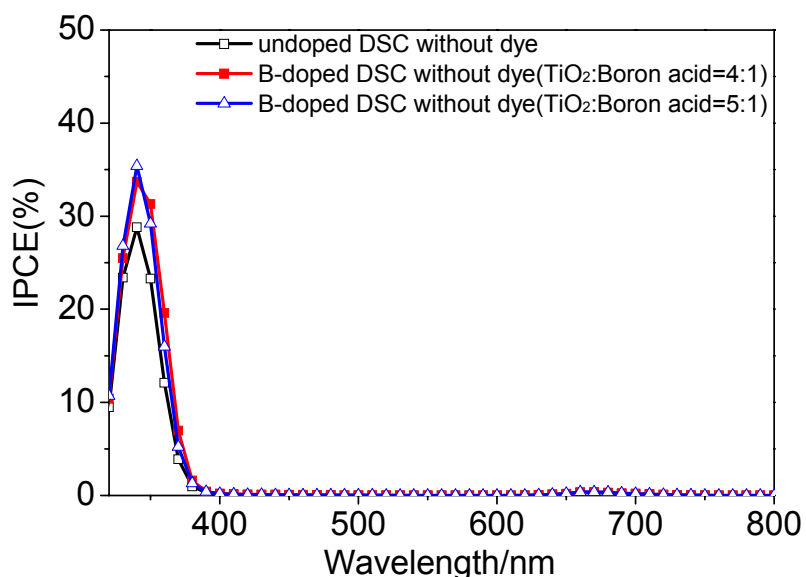

15 Figure S.1 Action spectra of the dye-sensitized solar cells based on undoped and boron-doped titania electrodes without dye absorption.

Table S.1 Properties of the B-doped and undoped TiO<sub>2</sub> in the DSCs

| Type of pastes                              | Crystallite size (nm) | BET Surface area(m <sup>2</sup> /g) |
|---------------------------------------------|-----------------------|-------------------------------------|
| undoped                                     | 15.2                  | 83.5                                |
| B-doped (TiO <sub>2</sub> : Boron acid=5:1) | 17.2                  | 72.8                                |
| B-doped (TiO <sub>2</sub> : Boron acid=4:1) | 17.5                  | 71.0                                |

5 Table S.2 Characteristic parameters of the impedance spectra of DSCs based on undoped and boron-doped photoanodes in the dark at an applied forward bias of -0.72V.

| DSC                                           | $R_0(\Omega)$ | $R_{ct}(\Omega)$ | $C_{\mu}(mF)$ | $R_p(\Omega)$ | $\tau = R_{ct} C_{\mu}(ms)$ |
|-----------------------------------------------|---------------|------------------|---------------|---------------|-----------------------------|
| undoped                                       | 1.02          | 5.5              | 16.0          | 1.8           | 88.0                        |
| B-doped<br>(TiO <sub>2</sub> :Boron acid=4:1) | 1.06          | 5.2              | 15.9          | 1.2           | 82.7                        |
| B-doped<br>(TiO <sub>2</sub> :Boron acid=5:1) | 1.04          | 4.9              | 15.9          | 1.5           | 80.0                        |
